# Supplementary material
Source: publisher site journal article supplement (https://www.dovepress.com/article/490652)
Supplement: Supplementary file 1 [file get_supplementary_file.php]

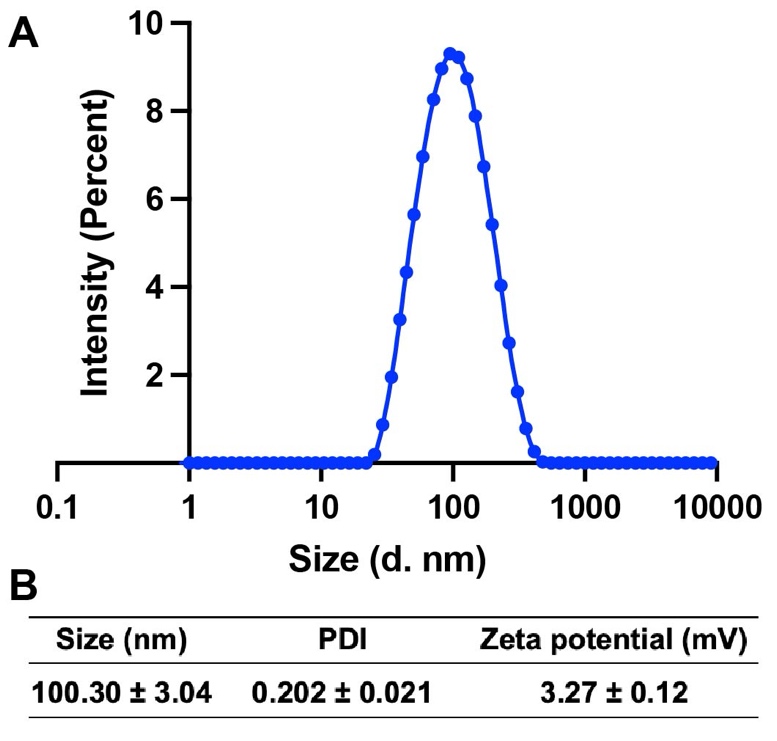


**Figure S1.** (A) Intensity result of size distribution size via dynamic light scattering (DLS) measurement of Fe3O4 Nanoparticles in H2O. (B) size, PDI and zeta potential of Fe3O4 nanoparticles (n = 5; mean ± SD).

**Figure S2.**Storage stability of Fe3O4 nanoparticles after incubation in DMEM with/without 10% FBS at 37 °C as indicated by the particle size measured by dynamic light scattering (DLS) (n = 5; mean ± SD).

**Figure S3.**  In vitro release of DOX from aqueous solutions of Fe/DOX@SL microrobots (n = 5; mean ± SD). Dialysis method was used to study the release property of DOX from microrobots.

**Figure S4.**Cell viability of T24 cells incubated with free DOX, and Fe/DOX@SL microrobots after 24 h (n = 5; mean ± SD).


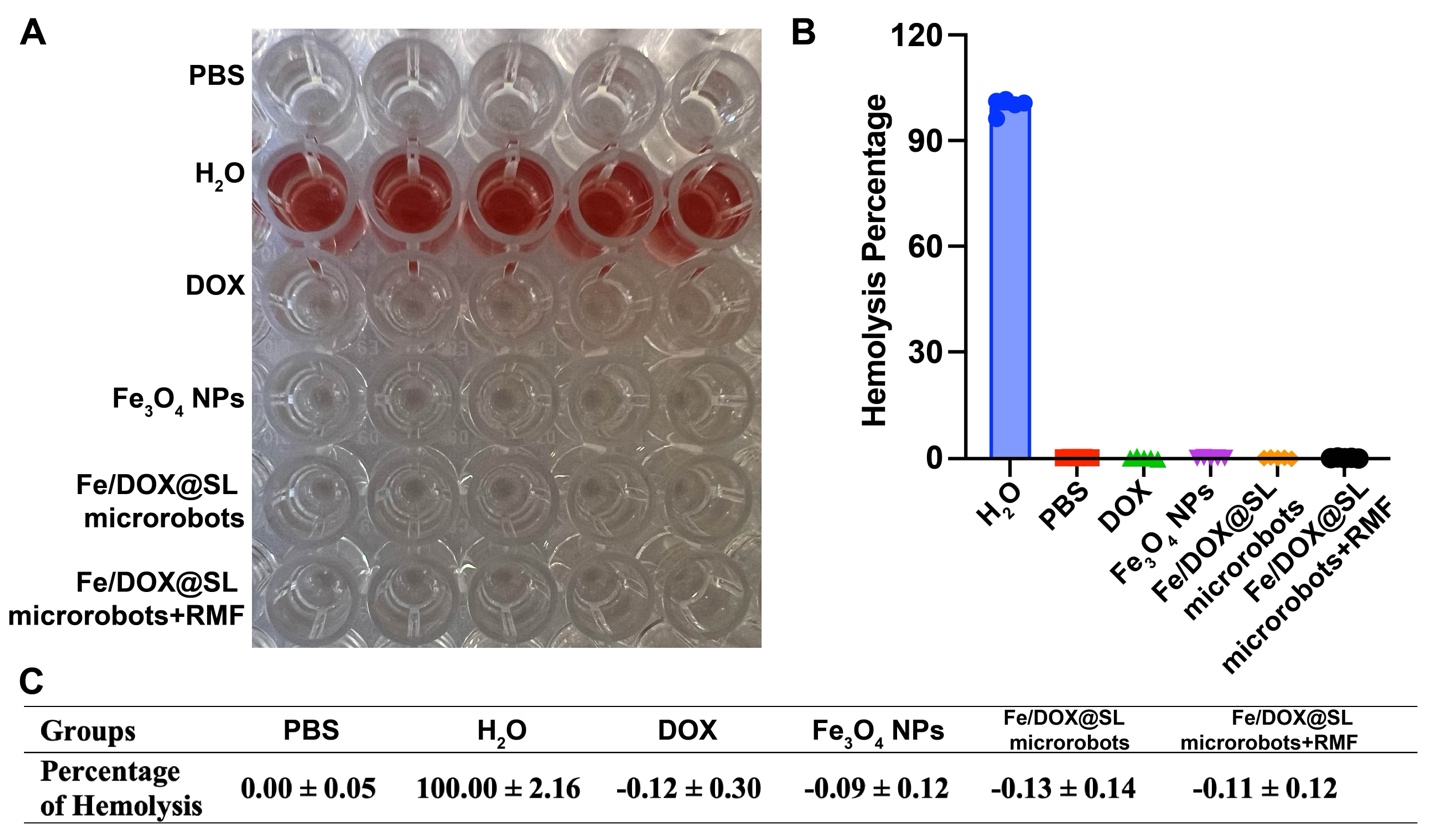


**Figure S5.** *In vitro* analysis of hemolytic properties. (A) The images showed the profiles of the centrifuged solution incubated with PBS, distilled water, free DOX, Fe3O4 nanoparticles (NPs), Fe/DOX@SL microrobots, and Fe/DOX@SL microrobots with RMF. (B) and (C) Percentage of hemolysis of different groups (n = 5; mean ± SD).
